# Supplementary material
Source: Springer Nature journal article supplement (https://www.springermedizin.de/resource/supplementary/12936_2009_934_MOESM8_ESM.pdf/9548568)

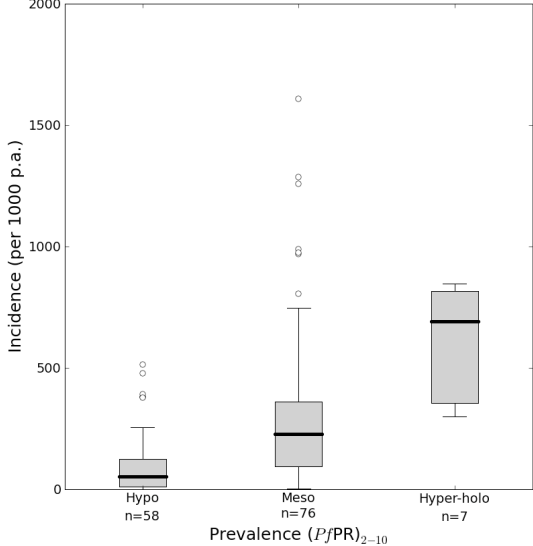

Supplement: MOESM8 [file 9548568]
